# Supplementary material for: Conceptualising contexts, mechanisms and outcomes for implementing large-scale, multisite hospital improvement initiatives: a realist synthesis
Source: PubMed Central journal article supplement — BMJ Open. 2022 May 18;12(5):e058158. doi: 10.1136/bmjopen-2021-058158 (PMC9126051; doi:10.1136/bmjopen-2021-058158), 2022-05-18
Supplement: bmjopen-2021-058158.reviewer_comments.pdf [file bmjopen-2021-058158.reviewer_comments.pdf]

## PEER REVIEW HISTORY

BMJ Open publishes all reviews undertaken for accepted manuscripts. Reviewers are asked to complete a checklist review form (<http://bmjopen.bmj.com/site/about/resources/checklist.pdf>) and are provided with free text boxes to elaborate on their assessment. These free text comments are reproduced below.

### ARTICLE DETAILS

|                            |                                                                                                                                                  |
|----------------------------|--------------------------------------------------------------------------------------------------------------------------------------------------|
| <b>TITLE (PROVISIONAL)</b> | Conceptualising contexts, mechanisms and outcomes for implementing large-scale, multi-site hospital improvement initiatives: a realist synthesis |
| <b>AUTHORS</b>             | Long, Janet; Sarkies, Mitchell N; Francis Auton, Emilie; Nguyen, Hoa Mi; Pomare, Chiara; Hardwick, Rebecca; Braithwaite, Jeffrey                 |

### VERSION 1 – REVIEW

|                        |                                                                                                              |
|------------------------|--------------------------------------------------------------------------------------------------------------|
| <b>REVIEWER</b>        | HASSIOTIS, ANGELA<br>ROYAL FREEand UNIVERSITY COLLEGE MEDICAL SCHOOL,<br>PSYCHIATRY and BEHAVIOURAL SCIENCES |
| <b>REVIEW RETURNED</b> | 02-Nov-2021                                                                                                  |

|                         |                                                                                                                                                                                                                                                                                                                                                                                                                                                                                                                                                                                                                                                                                                                                                                                                                                                                                                                                                                                                                                                                                                                                                                                                                                                                                                            |
|-------------------------|------------------------------------------------------------------------------------------------------------------------------------------------------------------------------------------------------------------------------------------------------------------------------------------------------------------------------------------------------------------------------------------------------------------------------------------------------------------------------------------------------------------------------------------------------------------------------------------------------------------------------------------------------------------------------------------------------------------------------------------------------------------------------------------------------------------------------------------------------------------------------------------------------------------------------------------------------------------------------------------------------------------------------------------------------------------------------------------------------------------------------------------------------------------------------------------------------------------------------------------------------------------------------------------------------------|
| <b>GENERAL COMMENTS</b> | <p>The manuscript is quite interesting in its scope about the implementation of large scale hospital improvement initiatives. Whilst I found it very informative and well written I think it could be improved by adding a clearer context as to which initiatives the authors are talking about and which type of hospitals. As I understood it, the manuscript describes a project that is part of a wider investigation but not sufficiently contextualised. The realist methodology is broadly well defined but how does this sit within the wider programme would be very helpful to a reader. Also, I think that implementation may be patchy for certain interventions but where things are mandatory and could be linked to patient harm including death (as might be in surgical environments) the issues at play are probably different and potentially implementation of change is mandated. Another angle that seems to be missing is the impact of patient experience and how this is harnessed within the literature and in the initiative implementation. Not all initiatives are well tolerated or accepted by the patients who should benefit from them.</p> <p>I would welcome, as reviewer, and interested clinician some consideration of these points in the context of the work.</p> |
|-------------------------|------------------------------------------------------------------------------------------------------------------------------------------------------------------------------------------------------------------------------------------------------------------------------------------------------------------------------------------------------------------------------------------------------------------------------------------------------------------------------------------------------------------------------------------------------------------------------------------------------------------------------------------------------------------------------------------------------------------------------------------------------------------------------------------------------------------------------------------------------------------------------------------------------------------------------------------------------------------------------------------------------------------------------------------------------------------------------------------------------------------------------------------------------------------------------------------------------------------------------------------------------------------------------------------------------------|

|                        |                                                             |
|------------------------|-------------------------------------------------------------|
| <b>REVIEWER</b>        | Ward, Marie<br>Trinity College Dublin, School of Psychology |
| <b>REVIEW RETURNED</b> | 10-Dec-2021                                                 |

|                         |                                                                                                                                                                                                             |
|-------------------------|-------------------------------------------------------------------------------------------------------------------------------------------------------------------------------------------------------------|
| <b>GENERAL COMMENTS</b> | This is a really interesting and important piece of work in relation to understanding the mechanisms for large-scale multi-site hospital improvements. Some minor suggestions for improvement are attached. |
|-------------------------|-------------------------------------------------------------------------------------------------------------------------------------------------------------------------------------------------------------|

**VERSION 1 – AUTHOR RESPONSE**

|                | Reviewer's Comments                                                                                                                                                                                                                                                                                                                                                                                                                                                                                                                                                                                     | Author's Response                                                                                                                                                                                                                                                                                                                                                                                                                                                                                                                                                                                                                                                                                                                                                                                                                                                                                                                                                                                                                                                                                                                                                                                                                                                                                                                                                                                                                                                                                                                                                         | Page in mss |
|----------------|---------------------------------------------------------------------------------------------------------------------------------------------------------------------------------------------------------------------------------------------------------------------------------------------------------------------------------------------------------------------------------------------------------------------------------------------------------------------------------------------------------------------------------------------------------------------------------------------------------|---------------------------------------------------------------------------------------------------------------------------------------------------------------------------------------------------------------------------------------------------------------------------------------------------------------------------------------------------------------------------------------------------------------------------------------------------------------------------------------------------------------------------------------------------------------------------------------------------------------------------------------------------------------------------------------------------------------------------------------------------------------------------------------------------------------------------------------------------------------------------------------------------------------------------------------------------------------------------------------------------------------------------------------------------------------------------------------------------------------------------------------------------------------------------------------------------------------------------------------------------------------------------------------------------------------------------------------------------------------------------------------------------------------------------------------------------------------------------------------------------------------------------------------------------------------------------|-------------|
| Reviewer #1 AH |                                                                                                                                                                                                                                                                                                                                                                                                                                                                                                                                                                                                         |                                                                                                                                                                                                                                                                                                                                                                                                                                                                                                                                                                                                                                                                                                                                                                                                                                                                                                                                                                                                                                                                                                                                                                                                                                                                                                                                                                                                                                                                                                                                                                           |             |
|                | <p>The manuscript is quite interesting in its scope about the implementation of large scale hospital improvement initiatives. Whilst I found it very informative and well written I think it could be improved by adding a clearer context as to which initiatives the authors are talking about and which type of hospitals. As I understood it, the manuscript describes a project that is part of a wider investigation but not sufficiently contextualised. The realist methodology is broadly well defined but how does this sit within the wider programme would be very helpful to a reader.</p> | <p>Thank you for your careful reading of the paper. We have added in more detail about the type of improvement initiatives we mean (to complement the existing examples).</p> <p><i>Large-scale hospital interventions, as discussed here, are projects that are typically intended to be implemented across multiple hospitals (e.g., all public hospitals in a region). They are usually “top down” in nature, in contrast to local, clinician-initiated “grass-roots” projects. The mandate to implement these initiatives is typically from the hospitals’ funding or governing bodies (e.g., State Health Departments, or local health networks), or high level clinical agencies (e.g., a national Quality and Safety Commission). Such interventions may be supported by additional staff and resources, and align with other high-level health system priorities...</i></p> <p><i>The QUARISMA intervention in Quebec, Canada, for example, was implemented in 32 hospitals.(1) The intervention was based on best practice guidelines derived from recommendations of the Society of Obstetricians and Gynaecologists. The hospitals that implemented it, successfully and safely reduced the rates of clinically unwarranted caesarean sections in low risk mothers.(1) Another example of a large-scale hospital intervention is the World Health Organisation’s surgical safety check-list(2) which was successfully adopted in six high performing hospitals in The Netherlands. This significantly reduced surgical complications and mortality.(3)</i></p> | P.6         |

|  |                                                                                                                                                                                                                                                                                                            |                                                                                                                                                                                                                                                                                                                                                                                                                                                                                                                                                                                                                                                                                                                                                                                                                                                                                                                                                                                                                   |      |
|--|------------------------------------------------------------------------------------------------------------------------------------------------------------------------------------------------------------------------------------------------------------------------------------------------------------|-------------------------------------------------------------------------------------------------------------------------------------------------------------------------------------------------------------------------------------------------------------------------------------------------------------------------------------------------------------------------------------------------------------------------------------------------------------------------------------------------------------------------------------------------------------------------------------------------------------------------------------------------------------------------------------------------------------------------------------------------------------------------------------------------------------------------------------------------------------------------------------------------------------------------------------------------------------------------------------------------------------------|------|
|  |                                                                                                                                                                                                                                                                                                            | <p>We have also clarified the context of the wider project to show this study's relevance:</p> <p><i>Both parts of the synthesis are part of a larger project (4) examining seven Leading Better Value Care projects implemented in metropolitan, remote and regional-based hospitals (n=100) across New South Wales (NSW), Australia between 2016 and 2018.(4) These projects are based on a value-based care paradigm and address unwarranted clinical variation, and preventable hospitalisations across seven high impact conditions.(5) Early results from this project showed that implementation strategies accompanying the projects were variably successful across sites at eliciting buy-in and adoption of the interventions. This current study is informing a realist evaluation of the implementation strategies used to build a nuanced model to support future large-scale hospital implementations; specifically, by defining relevant concepts and proposing initial program theories.</i></p> |      |
|  | <p>Also, I think that implementation may be patchy for certain interventions but where things are mandatory and could be linked to patient harm including death (as might be in surgical environments) the issues at play are probably different and potentially implementation of change is mandated.</p> | <p>You raise an interesting point about implementation and enforceability of clinician actions. Mandatory practices are not included in our definition. We focussed on improvement initiatives: reducing unwarranted variation (e.g., reducing treatments that were only poorly supported by evidence in favour of ones that were more strongly supported), or ensuring processes that may be missed were consistently incorporated into clinicians' workflow. We have added the following clarifying sentence:</p> <p><i>The focus of these initiatives is improvement of care and did not include mandated, enforceable health orders.</i></p>                                                                                                                                                                                                                                                                                                                                                                  | p.5  |
|  | <p>Another angle that seems to be missing is the impact of patient experience and how this is harnessed within the literature and in the initiative implementation. Not all initiatives are well tolerated or accepted by the patients who should benefit from them.</p>                                   | <p>This is a good point but we did not find any literature that reported on patient input. We have added this explicitly in the limitations.</p> <p><i>Notable was the lack of accounts of patient involvement in implementation plans.</i></p>                                                                                                                                                                                                                                                                                                                                                                                                                                                                                                                                                                                                                                                                                                                                                                   | P.20 |





|                                                                                                                                                                                                                                                                                                                                                                                                                                                                                                                                                                                                                                                                                                                                                                                                                                                              |                                                                                                                                                                                                                                                                                                                                                                                                                                                                                                                                                                                                                                                                                                                                                                                                                                                                                                |             |
|--------------------------------------------------------------------------------------------------------------------------------------------------------------------------------------------------------------------------------------------------------------------------------------------------------------------------------------------------------------------------------------------------------------------------------------------------------------------------------------------------------------------------------------------------------------------------------------------------------------------------------------------------------------------------------------------------------------------------------------------------------------------------------------------------------------------------------------------------------------|------------------------------------------------------------------------------------------------------------------------------------------------------------------------------------------------------------------------------------------------------------------------------------------------------------------------------------------------------------------------------------------------------------------------------------------------------------------------------------------------------------------------------------------------------------------------------------------------------------------------------------------------------------------------------------------------------------------------------------------------------------------------------------------------------------------------------------------------------------------------------------------------|-------------|
| <p>Similarly it needs to be made clearer who took part in the research team workshop; their backgrounds and expertise in relation to implementation science or realist synthesis.</p>                                                                                                                                                                                                                                                                                                                                                                                                                                                                                                                                                                                                                                                                        | <p>We have clarified:</p> <p><i>This [step 1] was done by the research team in two one-hour meetings. This list was verified and expanded through ongoing discussions with partners involved in large-scale, multi-site initiatives at the NSW Ministry of Health (senior policy-makers), Agency for Clinical Innovation (senior implementation support strategists) and the Bureau of Health Information (senior data management and analysis professionals). Discussions occurred as one-on-one interactions (via email) or part of project meetings/updates.</i></p>                                                                                                                                                                                                                                                                                                                        | <p>P.10</p> |
| <p>It needs to be made clearer the process by which the 5 mid-range theories were chosen and why others were not. For example why was socio-technical system engineering not chosen; the only strategy that did not map to the ERIC taxonomy was alignment to strategic objectives – this is a key starting point (goal alignment) of STS engineering.</p> <p>McDonald N, McKenna L, Vining R, Doyle B, Liang J, Ward ME, Ulfvengren P, Geary U, Guilfoyle J, Shuhaiber A, Hernandez J, Fogarty M, Healy U, Tallon C, Brennan R. Evaluation of an Access-Risk-Knowledge (ARK) Platform for Governance of Risk and Change in Complex Socio-Technical Systems. <i>International Journal of Environmental Research and Public Health</i>. 2021; 18(23):12572. <a href="https://doi.org/10.3390/ijerph182312572">https://doi.org/10.3390/ijerph182312572</a></p> | <p>We thank you for this reference. We have expanded this section about theory selection and note that our short list of theories was to some extent pragmatic – time constraints being an issue on this funded research. We also have added this constraint to the limitations.</p> <p><i>Many theories were proposed in the workshop, mainly from our prior research experience. We also read up on theories proposed by other realist researchers and added them for consideration. This work was being done in parallel with the realist evaluation of the actual state-wide initiative so this also guided our thinking. This resulted in a short list of promising theories....</i></p> <p><i>Theories were retained or excluded on their ability to broadly describe what was happening in one or more implementation strategies, how and why across a range of contexts, and a</i></p> | <p>P.12</p> |

|  |                                                                                                                                     |                                                                                                                                                                                                                          |  |
|--|-------------------------------------------------------------------------------------------------------------------------------------|--------------------------------------------------------------------------------------------------------------------------------------------------------------------------------------------------------------------------|--|
|  |                                                                                                                                     | <p><i>range of levels (micro, meso and macro).</i></p> <p><i>Limitations</i></p> <p><i>Another limitation was the need to constrain our search and inquiry to a subset of strategies and a single formal theory.</i></p> |  |
|  | <p>On the RAMESES table – rather than ‘yes’ throughout the detail of where in the paper this point is addressed could be added.</p> | <p>These have now been added.</p>                                                                                                                                                                                        |  |

**VERSION 2 – REVIEW**

|                         |                                                                                                                                                                |
|-------------------------|----------------------------------------------------------------------------------------------------------------------------------------------------------------|
| <b>REVIEWER</b>         | Ward, Marie<br>Trinity College Dublin, School of Psychology                                                                                                    |
| <b>REVIEW RETURNED</b>  | 16-Mar-2022                                                                                                                                                    |
| <b>GENERAL COMMENTS</b> | Well done on this really interesting and important piece of work in relation to understanding the mechanisms for large-scale multi-site hospital improvements. |
