# Supplementary material for: Conceptualising contexts, mechanisms and outcomes for implementing large-scale, multisite hospital improvement initiatives: a realist synthesis
Source: PubMed Central journal article supplement — BMJ Open. 2022 May 18;12(5):e058158. doi: 10.1136/bmjopen-2021-058158 (PMC9126051; doi:10.1136/bmjopen-2021-058158), 2022-05-18
Supplement: bmjopen-2021-058158supp002.pdf [file bmjopen-2021-058158supp002.pdf]

## Supplementary File

*Concepts and features associated with implementation of large-scale hospital interventions. (\* denotes concepts added after literature review)*

| <b>Concept</b>                      | <b>Associated Features</b>                                  | <b>Antecedents</b>                                                                                           | <b>Intended Outcome</b>                                                                                                             | <b>Supported by the literature?</b> | <b>Comments and examples</b>                                                                                                                                                                                      |
|-------------------------------------|-------------------------------------------------------------|--------------------------------------------------------------------------------------------------------------|-------------------------------------------------------------------------------------------------------------------------------------|-------------------------------------|-------------------------------------------------------------------------------------------------------------------------------------------------------------------------------------------------------------------|
| <b>External, top-down source</b>    | Implementing externally developed interventions             | Basic and applied research undertaken                                                                        | Standardised, evidence-based practice used across sites                                                                             | Always                              | Developed by quality or safety agencies, <sup>34</sup> research institutes / groups, <sup>24</sup> professional colleges                                                                                          |
|                                     | Support for implementation built into intervention          | Current locally held resources may be inadequate for effective implementation; knowledge and skills deficits | Social and practical support and relevant knowledge and skills acquisition assist implementation of intervention with high fidelity | Often                               | Intervention designed to provide implementation support through tools (e.g., <sup>35</sup> ), checklists (e.g., <sup>10</sup> ), or guidelines (e.g., <sup>36</sup> ). Education and skills building key elements |
|                                     | Aligns with organisational or state/nation-wide priorities  | Clear, coherent intentions developed and presented                                                           | Adoption of intervention through collective understanding of a clear intention                                                      | Often                               | Often synonymous with the large-scale intervention model <sup>12</sup>                                                                                                                                            |
|                                     | Incentives and disincentives for implementation are offered |                                                                                                              |                                                                                                                                     | Rarely                              | For one project a participation fee was charged for organisations, <sup>35</sup> for another, selected participants were paid <sup>37</sup>                                                                       |
| <b>Evidence-based interventions</b> | Implementing evidence-based interventions                   | Basic and applied research undertaken                                                                        | Standardised, evidence-based practice used across sites                                                                             | Always                              | Usually based on Level 1 evidence; sometimes informed by a pilot at a subset of sites <sup>38,39</sup>                                                                                                            |

|                                                                   |                                                                    |                                                                                                              |                                                                                                                                     |           |                                                                                                                                              |
|-------------------------------------------------------------------|--------------------------------------------------------------------|--------------------------------------------------------------------------------------------------------------|-------------------------------------------------------------------------------------------------------------------------------------|-----------|----------------------------------------------------------------------------------------------------------------------------------------------|
| <b>Safety and quality focus</b>                                   | De-implementation of previous practices                            | Current practices have been updated/outmoded                                                                 | New interventions                                                                                                                   | Rarely    | Rarely reported explicitly. Even for implementation of new IT systems, legacy software may be kept alongside the new <sup>31</sup>           |
|                                                                   | Clear aim of improving patient outcomes*                           | Clear, coherent intentions developed and presented                                                           | Adoption of intervention through collective understanding of a clear intention                                                      | Always    | With or without baseline data setting up a case for change, consistent understanding that intervention is needed to improve patient outcomes |
| <b>Facilitation through assessment and provision of resources</b> | Sites harness their positive safety culture                        | Work of improving patient outcomes seen as core business                                                     | Higher adoption and engagement through collective competencies and intentions                                                       | Rarely    | Rarely reported explicitly. Assumption made in most that positive safety culture exists.                                                     |
|                                                                   | External funding                                                   | Current locally held resources may be inadequate for effective implementation; knowledge and skills deficits | Social and practical support and relevant knowledge and skills acquisition assist implementation of intervention with high fidelity | Sometimes | Mix of external, internal or research funding                                                                                                |
|                                                                   | Support for comparison across sites implementing the intervention* | Siloed working may hide need for change                                                                      | Benchmarking and social support allow implementation of intervention with high fidelity                                             | Sometimes | Often included in research-based design or collaborative groups                                                                              |
|                                                                   | Support for planning and implementation activities from            | Current locally held resources may be inadequate for effective implementation;                               | Social and practical support and relevant knowledge and skills                                                                      | Sometimes | Research-based projects and those involving a collaborative group                                                                            |

|                                                              |                                                                     |                                                                                |                                                                                                                                     |           |                                                                                                                                                    |
|--------------------------------------------------------------|---------------------------------------------------------------------|--------------------------------------------------------------------------------|-------------------------------------------------------------------------------------------------------------------------------------|-----------|----------------------------------------------------------------------------------------------------------------------------------------------------|
|                                                              | external agencies*                                                  | knowledge and skills deficits                                                  | acquisition assist implementation of intervention with high fidelity                                                                |           | were most likely to give support; (e.g., <sup>26,40</sup> ) often given in-kind                                                                    |
|                                                              | Case for change made through data                                   | Limited or no understanding of the need for change; complacency                | Tension for change fosters adoption of the intervention                                                                             | Always    | Baseline data and local audit and feedback were common implementation strategies                                                                   |
|                                                              | Sites given a lead-in time to assess for readiness and local needs* | Naïve site, unprepared (even if willing) for change                            | Participants more likely to adopt change, exert greater effort, exhibit greater persistence, and display more cooperative behaviour | Sometimes | Formal needs/readiness assessments were sometimes reported <sup>39</sup>                                                                           |
| <b>Harnessing local resources and encouraging adaptation</b> | Executive support/ sponsorship                                      | Social and practical support for work of implementation not initially explicit | Intervention driven by local organisational ownership, active support, accountability and responsibility                            | Always    | While commonly reported, it was only implied in some papers<br><br>Variable use of the terms “support” and “sponsorship”                           |
|                                                              | Local adaptation encouraged / expected                              | Diversity of sites and contextual factors                                      | Both implementation and intervention can be tailored to suit local context without loss of fidelity                                 | Often     | Assumed step, often based on a quality assurance / improvement model                                                                               |
|                                                              | Clinical leadership                                                 | Social and practical support for work of implementation not initially explicit | Intervention driven by local organisational ownership, active support, accountability and responsibility                            | Often     | Involvement of clinical leads gave credibility, accountability to implementation efforts. Social influence through mentorship, leading by example. |
