# Supplementary material for: Conceptualising contexts, mechanisms and outcomes for implementing large-scale, multisite hospital improvement initiatives: a realist synthesis
Source: PubMed Central journal article supplement — BMJ Open. 2022 May 18;12(5):e058158. doi: 10.1136/bmjopen-2021-058158 (PMC9126051; doi:10.1136/bmjopen-2021-058158), 2022-05-18
Supplement: bmjopen-2021-058158supp003.pdf [file bmjopen-2021-058158supp003.pdf]

| ERIC implementation strategy                                                  | Our listed strategies                                         | Authors          |              |                |             |               |            |                 |               |                |                        |              |              |               |           |              |                 |              |
|-------------------------------------------------------------------------------|---------------------------------------------------------------|------------------|--------------|----------------|-------------|---------------|------------|-----------------|---------------|----------------|------------------------|--------------|--------------|---------------|-----------|--------------|-----------------|--------------|
|                                                                               |                                                               | Allegranzi, 2018 | Bayley, 2012 | Borchert, 2012 | Brink, 2020 | Cameron, 2015 | Cima, 2013 | Cresswell, 2011 | Cuypers, 2019 | de Groot, 2015 | Dekker-van Doorn, 2020 | Dumont, 2013 | Edward, 2017 | Forchuk, 2013 | Foy, 2004 | Fuller, 2012 | Grazioli, 2019) | Havers, 2019 |
| Access new funding                                                            | Extra staffing as needed; salary support; monetary incentives |                  | 1            |                |             |               |            |                 | 1             |                |                        |              |              |               |           |              |                 | 1            |
| Assess for readiness and identify barriers and facilitators                   | Readiness / give sites planning or lead-in time               |                  | 1            |                |             |               |            |                 | 1             | 1              |                        |              |              |               |           |              | 1               | 1            |
| Audit and provide feedback                                                    | Audit and Feedback                                            |                  |              |                |             |               |            |                 |               |                |                        | 1            |              |               |           |              |                 |              |
| Build a coalition; create new clinical teams; create a learning collaborative | Multidisciplinary involvement                                 | 1                |              |                |             |               | 1          |                 |               |                |                        | 1            | 1            |               |           | 1            |                 |              |
| Capture and share local knowledge                                             | Community of practice / knowledge network of clinicians       | 1                |              |                |             |               |            |                 |               |                |                        |              |              | 1             | 1         | 1            |                 | 1            |
| Change physical structure and equipment                                       | Funding for equipment                                         |                  |              |                |             |               |            |                 | 1             |                |                        | 1            |              |               |           |              |                 |              |
| Change physical structure and equipment                                       | Tools to improve communication                                |                  |              |                |             |               | 1          |                 |               |                |                        | 1            |              |               |           |              |                 |              |



|                                                                 |                                                                 |   |   |   |   |   |   |   |   |   |   |   |   |  |   |   |  |  |   |
|-----------------------------------------------------------------|-----------------------------------------------------------------|---|---|---|---|---|---|---|---|---|---|---|---|--|---|---|--|--|---|
| Develop educational materials; distribute educational materials | Education                                                       | 1 | 1 |   |   | 1 | 1 |   |   |   |   | 1 | 1 |  | 1 | 1 |  |  |   |
| Develop resource sharing agreements                             | Resources shared                                                |   |   |   |   |   |   |   |   |   |   |   |   |  |   |   |  |  |   |
| Distribute educational materials                                | Clinical practice guidelines                                    |   |   |   | 1 | 1 |   |   |   |   |   |   |   |  |   |   |  |  |   |
| Facilitation                                                    | Problem solving                                                 |   |   |   |   |   |   |   |   |   |   |   |   |  |   |   |  |  |   |
| Identify and prepare champions                                  | Champions                                                       |   |   |   |   |   |   |   |   | 1 |   |   |   |  |   |   |  |  |   |
| Inform local opinion leaders                                    | Opinion leaders; fostering positive safety culture              | 1 |   |   | 1 | 1 |   |   |   |   |   |   |   |  |   |   |  |  | 1 |
| Involve executive boards; Obtain formal commitments             | Executive sponsorship/engagement with the state-wide collective | 1 |   |   |   | 1 |   | 1 | 1 | 1 |   |   |   |  | 1 |   |  |  |   |
| Organize clinician implementation team meetings                 | Quarantined time for skill acquisition                          |   |   |   |   |   |   |   |   |   |   |   |   |  |   |   |  |  | 1 |
| Promote adaptability; purposely re-examine the implementation   | Evidence of local adaptation                                    | 1 | 1 | 1 | 1 | 1 | 1 |   | 1 |   | 1 | 1 | 1 |  | 1 | 1 |  |  |   |

|                                                                                                                                                                                                                                                                                               |                                                                    |   |   |   |   |  |   |  |   |   |   |  |  |   |  |  |   |  |  |
|-----------------------------------------------------------------------------------------------------------------------------------------------------------------------------------------------------------------------------------------------------------------------------------------------|--------------------------------------------------------------------|---|---|---|---|--|---|--|---|---|---|--|--|---|--|--|---|--|--|
| Provide clinical supervision                                                                                                                                                                                                                                                                  | Mentoring/<br>Supervision/<br>coaching                             | 1 |   | 1 | 1 |  | 1 |  | 1 | 1 |   |  |  | 1 |  |  |   |  |  |
| Recruit, designate, and train for leadership                                                                                                                                                                                                                                                  | Clinical leadership                                                |   | 1 | 1 |   |  |   |  |   |   |   |  |  | 1 |  |  |   |  |  |
| Use data experts                                                                                                                                                                                                                                                                              | IT and communication support for new processes                     |   |   |   |   |  | 1 |  |   |   | 1 |  |  |   |  |  | 1 |  |  |
| (No ERIC strategy)                                                                                                                                                                                                                                                                            | Align with organisational/<br>District and Departmental priorities | 1 |   |   |   |  |   |  |   |   |   |  |  |   |  |  |   |  |  |
| <b>Footnotes</b>                                                                                                                                                                                                                                                                              |                                                                    |   |   |   |   |  |   |  |   |   |   |  |  |   |  |  |   |  |  |
| [1] <a href="https://aci.health.nsw.gov.au/__data/assets/pdf_file/0007/291742/Clinical_Innovation_Program_Implementation_Guide.pdf">https://aci.health.nsw.gov.au/__data/assets/pdf_file/0007/291742/Clinical_Innovation_Program_Implementation_Guide.pdf</a>                                 |                                                                    |   |   |   |   |  |   |  |   |   |   |  |  |   |  |  |   |  |  |
| [2] <a href="https://www.canada.ca/content/dam/hc-sc/migration/hc-sc/hcs-sss/alt_formats/pdf/pubs/palliat/2008-acp-guide-pps/acp-guide-pps-eng.pdf">https://www.canada.ca/content/dam/hc-sc/migration/hc-sc/hcs-sss/alt_formats/pdf/pubs/palliat/2008-acp-guide-pps/acp-guide-pps-eng.pdf</a> |                                                                    |   |   |   |   |  |   |  |   |   |   |  |  |   |  |  |   |  |  |
| [3] <a href="https://www.nhmrc.gov.au/sites/default/files/images/a-guide-to-the-development-and-evaluation-of-clinical-practice-guidelines.pdf">https://www.nhmrc.gov.au/sites/default/files/images/a-guide-to-the-development-and-evaluation-of-clinical-practice-guidelines.pdf</a>         |                                                                    |   |   |   |   |  |   |  |   |   |   |  |  |   |  |  |   |  |  |
| [4] <a href="https://www.nice.org.uk/guidance/ng106/resources/chronic-heart-failure-in-adults-diagnosis-and-management-pdf-66141541311685">https://www.nice.org.uk/guidance/ng106/resources/chronic-heart-failure-in-adults-diagnosis-and-management-pdf-66141541311685</a>                   |                                                                    |   |   |   |   |  |   |  |   |   |   |  |  |   |  |  |   |  |  |
| [5] <a href="https://www.who.int/patientsafety/safesurgery/checklist_implementation/en/">https://www.who.int/patientsafety/safesurgery/checklist_implementation/en/</a>                                                                                                                       |                                                                    |   |   |   |   |  |   |  |   |   |   |  |  |   |  |  |   |  |  |

| 29 | Ynes, 2017 | Hendy, 2007 | Keller, 2019 | Kotagal, 2002 | Kourouche, 2019 | Luxton, 2014 | Makene, 2014 | Mansoori, 2012 | Marcus, 2019 | McCreight, 2019 | Merry, 2019 | Molina, 2016 | Moore, 2014 | Morrow, 2012 | Mudge, 2017 | Nocera, 2016 | Palomar, 2013 | Pronovost, 2006 | Pronovost, 2008 | Pun, 2005 | Reames, 2015 | Schwarzkopf, 2018 | Stollendorf, 2019 | Total |
|----|------------|-------------|--------------|---------------|-----------------|--------------|--------------|----------------|--------------|-----------------|-------------|--------------|-------------|--------------|-------------|--------------|---------------|-----------------|-----------------|-----------|--------------|-------------------|-------------------|-------|
|    |            |             |              |               |                 |              |              |                |              |                 |             |              | 1           |              |             |              |               |                 |                 |           |              |                   |                   |       |
|    | 1          |             |              | 1             |                 |              | 1            |                | 1            | 1               |             |              | 1           | 1            | 1           | 1            | 1             | 1               | 1               | 1         | 1            | 1                 |                   |       |
|    |            |             | 1            |               | 1               | 1            |              | 1              |              | 1               |             |              | 1           | 1            |             |              |               |                 |                 |           | 1            |                   |                   |       |
|    | 1          | 1           |              |               |                 | 1            |              |                | 1            | 1               |             |              | 1           |              |             |              |               |                 |                 |           | 1            | 1                 |                   |       |
|    |            |             |              |               |                 |              |              |                |              |                 |             |              |             |              |             |              |               |                 |                 |           |              |                   |                   | 1     |
|    |            |             |              |               |                 | 1            |              |                |              |                 |             | 1            |             |              |             |              | 1             |                 |                 |           |              |                   |                   |       |
|    | 1          |             |              |               |                 |              |              |                |              |                 | 1           |              |             |              |             |              |               |                 |                 |           |              |                   |                   |       |

|   |   |   |   |   |   |   |   |  |   |   |   |   |   |   |  |   |   |  |  |  |   |   |
|---|---|---|---|---|---|---|---|--|---|---|---|---|---|---|--|---|---|--|--|--|---|---|
|   | 1 |   |   |   |   |   |   |  |   |   |   |   | 1 |   |  |   |   |  |  |  |   |   |
| 1 |   |   |   | 1 |   |   |   |  |   |   |   |   |   |   |  |   |   |  |  |  |   |   |
|   | 1 | 1 | 1 |   |   |   |   |  |   |   |   | 1 |   |   |  |   |   |  |  |  |   |   |
| 1 |   |   |   |   |   |   |   |  |   |   |   |   |   |   |  |   |   |  |  |  |   |   |
|   | 1 | 1 |   | 1 |   | 1 |   |  | 1 | 1 |   |   |   |   |  |   |   |  |  |  |   | 1 |
|   | 1 |   |   | 1 |   |   |   |  |   |   |   |   |   |   |  | 1 |   |  |  |  |   |   |
|   |   |   |   |   |   |   |   |  |   |   |   |   |   |   |  |   |   |  |  |  |   |   |
|   |   |   |   | 1 | 1 |   | 1 |  |   | 1 | 1 |   | 1 | 1 |  |   | 1 |  |  |  |   |   |
|   |   | 1 |   |   |   |   | 1 |  |   |   |   |   |   |   |  |   |   |  |  |  | 1 | 1 |







| Atzis, 2014 | van Harten, 2018 | Vu, 2018 | Wand, 2019 | Wyld, 2014 | ACI Redesign [1] | Advance care planning (Canada)[2] NHMRC | Implementation Guideline [3] | NHS NICE Chronic heart failure [4] | WHO Surgical Checklist [5] | Sum |
|-------------|------------------|----------|------------|------------|------------------|-----------------------------------------|------------------------------|------------------------------------|----------------------------|-----|
| 1           |                  |          |            |            |                  | 1                                       |                              |                                    |                            | 6   |
| 1           | 1                | 1        | 1          | 1          | 1                |                                         |                              |                                    |                            | 24  |
|             |                  |          |            |            |                  | 1                                       |                              | 1                                  |                            | 11  |
| 1           |                  | 1        | 1          |            |                  |                                         |                              |                                    |                            | 16  |
| 1           |                  |          |            |            |                  |                                         |                              |                                    |                            | 11  |
|             |                  |          |            |            |                  | 1                                       |                              |                                    |                            | 6   |
|             |                  |          |            |            |                  |                                         |                              |                                    |                            | 4   |

|   |  |   |  |   |   |  |   |   |    |
|---|--|---|--|---|---|--|---|---|----|
| 1 |  |   |  |   |   |  |   |   | 5  |
| 1 |  | 1 |  | 1 |   |  | 1 |   | 10 |
|   |  |   |  | 1 | 1 |  | 1 | 1 | 12 |
|   |  | 1 |  | 1 | 1 |  | 1 |   | 7  |
|   |  |   |  | 1 | 1 |  |   | 1 | 14 |
| 1 |  |   |  |   |   |  | 1 | 1 | 10 |
|   |  |   |  |   |   |  |   |   | 14 |
|   |  |   |  |   |   |  |   |   | 6  |

|   |   |   |   |   |   |   |   |   |   |           |
|---|---|---|---|---|---|---|---|---|---|-----------|
|   |   |   |   |   |   |   |   |   |   |           |
|   | 1 |   |   | 1 | 1 | 1 | 1 | 1 | 1 | <b>18</b> |
|   |   |   |   |   |   |   |   |   |   | <b>1</b>  |
|   |   |   |   |   |   |   | 1 |   |   | <b>8</b>  |
| 1 |   |   |   |   |   |   |   |   |   | <b>2</b>  |
|   |   |   | 1 | 1 | 1 |   |   |   |   | <b>4</b>  |
| 1 |   |   |   |   |   |   | 1 |   |   | <b>7</b>  |
|   |   |   |   |   | 1 | 1 | 1 | 1 | 1 | <b>24</b> |
|   | 1 |   |   |   |   |   |   |   |   | <b>4</b>  |
| 1 | 1 | 1 | 1 |   |   |   |   | 1 |   | <b>34</b> |
