# Supplementary material for: Conceptualising contexts, mechanisms and outcomes for implementing large-scale, multisite hospital improvement initiatives: a realist synthesis
Source: PubMed Central journal article supplement — BMJ Open. 2022 May 18;12(5):e058158. doi: 10.1136/bmjopen-2021-058158 (PMC9126051; doi:10.1136/bmjopen-2021-058158), 2022-05-18
Supplement: bmjopen-2021-058158supp004.pdf [file bmjopen-2021-058158supp004.pdf]

## Supplementary file 4: RAMESES publication standards checklist

|    |                                                                                                                                                                                                                                                                                                                                                                                                                                                                                 |     |                                          |
|----|---------------------------------------------------------------------------------------------------------------------------------------------------------------------------------------------------------------------------------------------------------------------------------------------------------------------------------------------------------------------------------------------------------------------------------------------------------------------------------|-----|------------------------------------------|
| 1  | Title, identifies the document as a realist synthesis or review.                                                                                                                                                                                                                                                                                                                                                                                                                | Yes | Page 1                                   |
| 2  | Abstracts should ideally contain brief details of the study's background, review question or objectives; search strategy; methods of selection, appraisal, analysis and synthesis of sources; main results; and implications for practice.                                                                                                                                                                                                                                      | Yes | Page 3-4                                 |
| 3  | Explain why the review is needed and what it is likely to contribute to existing understanding of the topic area.                                                                                                                                                                                                                                                                                                                                                               | Yes | Page 7-8                                 |
| 4  | State the objective(s) of the review and/or the review question(s). Define and provide a rationale for the focus of the review.                                                                                                                                                                                                                                                                                                                                                 | Yes | Page 8                                   |
| 5  | Any changes made to the review that was initially planned should be briefly described and justified.                                                                                                                                                                                                                                                                                                                                                                            | NA  |                                          |
| 6  | Explain why realist synthesis was considered the most appropriate method to use.                                                                                                                                                                                                                                                                                                                                                                                                | Yes | Page 7                                   |
| 7  | Describe and justify the initial process of exploratory scoping of the literature.                                                                                                                                                                                                                                                                                                                                                                                              | Yes | Page 9                                   |
| 8  | State and provide a rationale for how the iterative searching was done. Provide details on all the sources accessed for information in the synthesis. For example, where electronic databases have been searched, details should include, for example, the name of the database, search terms, dates of coverage and date last searched. If individuals familiar with the relevant literature and/or topic area were contacted, indicate how they were identified and selected. | Yes | Page 9 and 10                            |
| 9  | Explain how judgements were made about including and excluding data from documents, and justify these.                                                                                                                                                                                                                                                                                                                                                                          | Yes | Page 10                                  |
| 10 | Describe and explain which data or information were extracted from the included documents and justify this selection.                                                                                                                                                                                                                                                                                                                                                           | Yes | Page 10, 11, Supplementary files 1 and 3 |
| 11 | Describe the analysis and synthesis processes in detail. This section should include information on the constructs analysed and describe the analytic process.                                                                                                                                                                                                                                                                                                                  | Yes | Page 11, 12 and 15,16                    |
| 12 | Provide details on the number of documents assessed for eligibility and included in the review with reasons for exclusion at each stage, as well as an indication of their source                                                                                                                                                                                                                                                                                               | Yes | Abstract briefly, Table 2                |

|    |                                                                                                                                                                                                                                                                                                                                                                  |     |                      |
|----|------------------------------------------------------------------------------------------------------------------------------------------------------------------------------------------------------------------------------------------------------------------------------------------------------------------------------------------------------------------|-----|----------------------|
|    | of origin (for example, from searching databases, reference lists and so on).                                                                                                                                                                                                                                                                                    |     |                      |
| 13 | Provide information on the characteristics of the documents included in the synthesis.                                                                                                                                                                                                                                                                           | Yes | Supplementary file 1 |
| 14 | Present the key findings with a specific focus on theory building and testing.                                                                                                                                                                                                                                                                                   | Yes | Pages 15, 16 and 17  |
| 15 | Summarize the main findings, taking into account the synthesis' objective(s), research question(s), focus and intended audience(s).                                                                                                                                                                                                                              | Yes | Pages 17-18          |
| 16 | Discuss both the strengths of the review and its limitations. These should include (but need not be restricted to) (a) consideration of all the steps in the synthesis process and (b) comment on the overall strength of evidence supporting the explanatory insights that emerged. The limitations identified may point to areas where further work is needed. | Yes | Page 20              |
| 17 | Where applicable, compare and contrast the synthesis' findings with the existing literature (for example, other reviews) on the same topic.                                                                                                                                                                                                                      | Yes | Page 19              |
| 18 | List the main implications of the findings and place these in the context of other relevant literature. If appropriate, offer recommendations for policy and practice.                                                                                                                                                                                           | Yes | Page 20              |
| 19 | Provide details of funding source (if any) for the synthesis, the role played by the funder (if any) and any conflicts of interests of the reviewers.                                                                                                                                                                                                            | Yes | Page 5               |
