# Supplementary material for: Conceptualising contexts, mechanisms and outcomes for implementing large-scale, multisite hospital improvement initiatives: a realist synthesis
Source: PubMed Central journal article supplement — BMJ Open. 2022 May 18;12(5):e058158. doi: 10.1136/bmjopen-2021-058158 (PMC9126051; doi:10.1136/bmjopen-2021-058158), 2022-05-18
Supplement: bmjopen-2021-058158supp005.pdf [file bmjopen-2021-058158supp005.pdf]

## Search terms for Step 1

### PubMed

*health [Title/Abstract] AND (((implementation [Title/Abstract] OR driver [Title/Abstract]) OR change [Title/Abstract]) AND large-scale [Title/Abstract]) AND ((innovation [Title/Abstract] OR intervention [Title/Abstract]) OR program [Title/Abstract])) AND hospital [Title/Abstract]*

*Limits: English language  
No date limits*

### Medline, Embase (Ovid)

*health [keyword] AND (((implementation [keyword] OR driver [keyword]) OR change [keyword]) AND large-scale [keyword]) AND ((innovation [keyword] OR intervention [keyword]) OR program [keyword])) AND hospital [keyword]*

*Limits: English language  
No date limits*

### CINAHL (Ebscohost)

*health [Abstract] AND (((implementation [Abstract] OR driver [Abstract]) OR change [Abstract]) AND large-scale [Abstract]) AND ((innovation [Abstract] OR intervention [Abstract]) OR program [Abstract])) AND hospital [Abstract]*

*Limits: English language  
No date limits*

## Search terms for Step 2

### Web of Science.

*systematic review [title] AND Implementation [title] AND health [topic heading]*

*Limits: English language  
No date limits*
